# Supplementary material for: A Tomato EMS-Mutagenized Population Provides New Valuable Resources for Gene Discovery and Breeding of Developmental Traits
Source: MDPI journal article supplement (doi:10.3390/plants11192453), 2022-09-20
Supplement: s1 [file s1]

**Supplementary Table S1.** Alignment and processing statistics for sequencing read data against the tomato genome reference sequence version 2.5 (ITAG2.4).

|                                                          | MoneyMaker <sup>a</sup> | <i>sin</i> wild-type pool <sup>b</sup> | <i>sin</i> mutant pool <sup>c</sup> |
|----------------------------------------------------------|-------------------------|----------------------------------------|-------------------------------------|
| Total sequencing reads                                   | 63,575,958              | 94,007,596                             | 99,685,109                          |
| Uniquely mapped reads                                    | 56,571,716<br>(88.98 %) | 88,279,910<br>(93.91 %)                | 92,975,595<br>(93.27 %)             |
| Multi-mapped reads                                       | 1,032,320<br>(1.62 %)   | 1,355,151<br>(1.44 %)                  | 1,496,688<br>(1.50 %)               |
| Unmapped reads                                           | 5,971,922<br>(9.39 %)   | 4,372,535<br>(4.65 %)                  | 5,212,826<br>(5.23 %)               |
| Sequencing depth                                         | 15.40 X                 | 34.02 X                                | 36.04 X                             |
| Sequence variants                                        | 813,450                 | 6,100,013                              | 6,707,616                           |
| <sup>a</sup> NCBI SRA BioSample accession: SAMN04093174. |                         |                                        |                                     |
| <sup>b</sup> NCBI SRA BioSample accession: SAMN30553549. |                         |                                        |                                     |
| <sup>c</sup> NCBI SRA BioSample accession: SAMN30553548. |                         |                                        |                                     |
