# Supplementary material for: A Tomato EMS-Mutagenized Population Provides New Valuable Resources for Gene Discovery and Breeding of Developmental Traits
Source: MDPI journal article supplement (doi:10.3390/plants11192453), 2022-09-20
Supplement: s1 [file s1]

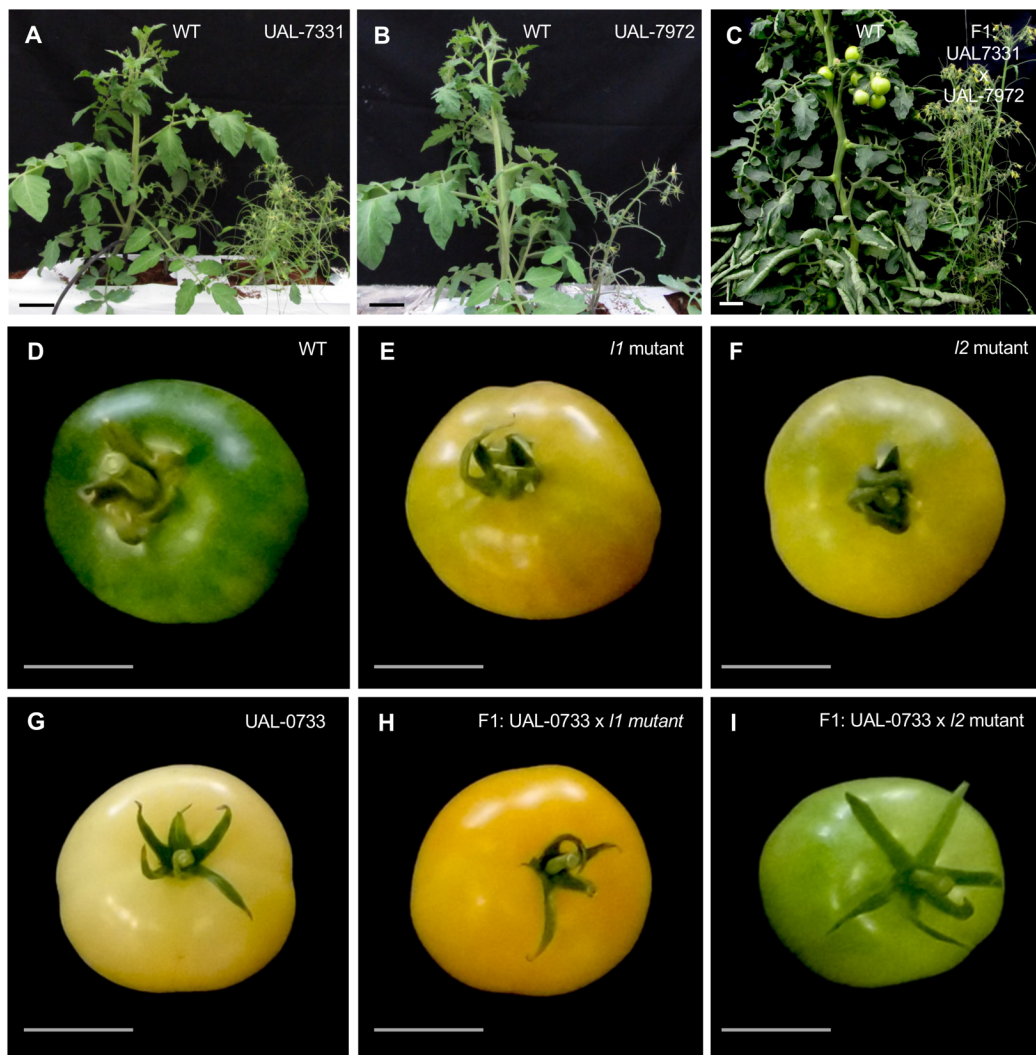

**Supplementary Figure S1.** Complementation test performed on several tomato mutants of the EMS collection. UAL-7331 mutant line (A) shows a *wiry*-like phenotype which is quite similar to that of UAL-7972 mutant line (B). Complementation test proved that these two lines are allelic (C). Fruits at mature green stage of wild-type (WT) plants (cv. Moneymaker background) (D); *lutescent1* (*l1*) mutant (E); *lutescent2* (*l2*) mutant line (F) and UAL-0733 mutant line (G). Mutant phenotype of F<sub>1</sub> plants derived from the cross of UAL-0733 and *l1* mutants proved that both mutations are allelic (H). Wild-type phenotype of F<sub>1</sub> plants from the cross of UAL-0733 × *l2* mutant indicates genetic complementation of both mutations, demonstrating that they are located in independent loci (I). Scale bars: 2.5 cm.
