# Supplementary material for: A Tomato EMS-Mutagenized Population Provides New Valuable Resources for Gene Discovery and Breeding of Developmental Traits
Source: MDPI journal article supplement (doi:10.3390/plants11192453), 2022-09-20
Supplement: s1 [file s1]

```

WT      MKEVLEKCVDSQLWHACAGGMVQIPPVNSKVYYFPQGHAETLMNVDFSALPRSPALILC 60
sin     MKEVLEKCVDSQLWHACAGGMVQIPPVNSKVYYFPQGHAETLMNVDFSALPRSPALILC 60
*****

WT      RVAAVKFLADPETDEVYAKIRVVPVGNGKGNDFDDDDDDILGSNESGTAEKPNSFAKTLTQS 120
sin     RVAAVKFLADPETDEVYAKIRVVPVGNGKGNDFDDDDDDILGSNESGTAEKPNSFAKTLTQS 120
*****

WT      DANNGGGFSVPRYCAETIFPRLDYTADPPVQTVTAKDVHGESWKFRHIYRGTPRRHLLTT 180
sin     DANNGGGFSVPRYCAETIFPRLDYTADPPVQTVTAKDVHGESWKFRHIYRGTPRRHLLTT 180
*****

WT      GWSSFVNQKKLVAGDSIVFLRAENGELCVGIRRAKRGGIGGPEAPSGWNSGAGNYGGFSA 240
sin     GWSSFVNQKKLVAGDSIVFLRAENGELCVGIRRAKRGGIGGPEAPSGWNSGAGNYGGFSA 240
*****

WT      FLREEMSKNGNLTSPTRSLRGKGRVRPESVVEAAYLASSGQPFEVVYYPRANTTPEFCVRA 300
sin     FLREEMSKNGNLTSPTRSLRGKGRVRPESVVEAAYLASSGQPFEVVYYPRANTTPEFCVRA 300
*****

WT      SSVNAAMRIQWCSGMRFKMAFETEDSSRISWFMGTISSIQLADPIRWPNSPWRLQLQVAWD 360
sin     SSVNAAMRIQWCSGMRFKMAFETEDSSRISWFMGTISSIQLADPIRWPNSPWRLQLQVAWD 360
*****

WT      EPDLLQNVKHVSPWLVELVSNMPVIHLSPFSPPRKKLRLPPDFSLDSQFQLPSFSGNPLR 420
sin     EPDLLQNVKHVSPWLVELVSNMPVIHLSPFSPPRKKLRLPPDFSLDSQFQLPSFSGNPLR 420
*****

WT      SSSPFCCLSDNITAGIQGARHAQFGVPLLDLHLSNKLPSGLLPPSFQ RVAANSQ-----L 475
sin     SSSPFCCLSDNITAGIQGARHANLEYLYWIFTLATNYRQD----CYHQVSSALQPTHNFL 476
*****:::  *:..  .::*:  *  *

WT      PNVINKCQNDNRNDNISCLLTMTGTSSKTLDKNDSVNTPRFLLFGQPILTEQQISNGCSVSA 535
sin     MSSISAKMTEMITSLVCLQWVLQVR-----HWTKMIV----- 508
      . *.  .:  .: **  :  :  *:

WT      PQVVQGTGKDLGRIQPINKEHPSEQKGSIQDNLSSATFFWNRGYHAAELGVLNTGHCKVFL 595
sin     ----- 508

WT      ESEDVGRITLDLSVMGSYEELYKRLANMFGLERPDMLTRVLYHDATGAVKHTGDEPFSD 655
sin     ----- 508

WT      KSAKRLTILMNSSSNIKRKWLTGLATAERGLDSSNQAGPLSIFA 699
sin     ----- 508

```

**Supplementary Figure S2.** Alignment performed between wild-type (WT) and sepal indehiscent (sin) mutant proteins. The DNA B3 binding domain and the Auxin Response Factor domain (middle region) appear underlined by a solid and dashed line respectively. Sl-miRNA160a target sequence is highlighted in gray. Nuclear Localization Signal (NLS) motifs appear in bold. Finally, type III Aux/IAA domain appears in red whereas type IV Aux/IAA is displayed in bold red letters.
